# Supplementary material for: Retinal organoids on-a-chip: a micro-millifluidic bioreactor for long-term organoid maintenance
Source: Royal Society of Chemistry journal article supplement (doi:10.1039/d1lc00011j), 2021-01-01
Supplement: d1lc00011j1.pdf [file d1lc00011j1.pdf]

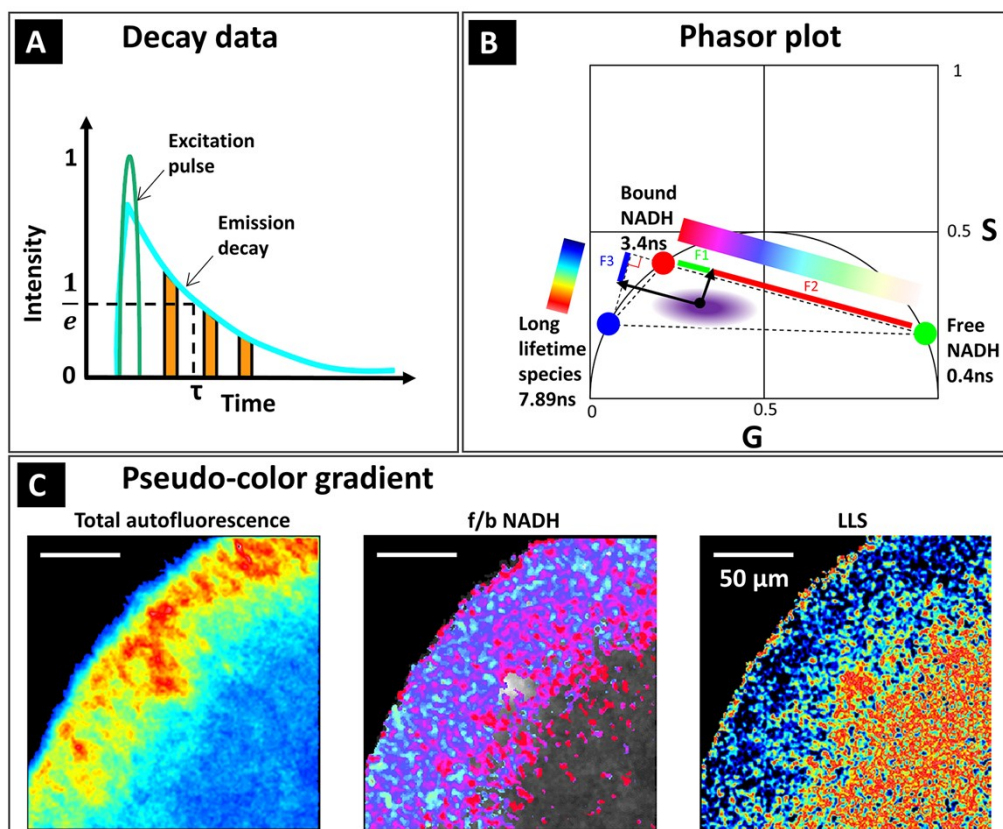

**Figure S1: Fluorescence lifetime imaging and analysis using the phasor approach.** (A) Fluorescence lifetime was acquired by quantifying emitted fluorescent photon over time after an excitation pulse was supplied to obtain an emission decay curve; (B) Phasor plot produced a 2-dimensional space for intrinsic fluorophors with different lifetimes corresponding with different types of metabolism (oxidative phosphorylation favors bound NADH and glycolysis favors free NADH) and different amounts of oxidative stress (long lifetime species). The free/bound NADH ratio and long LLS ratio were obtained by calculating projecting the 3 dimensional photon count histogram onto the Bound-Free axis and LLS axis respectively; (C) A representative images of RtOg analyzed by the phasor approach. The autofluorescence images encapsulated all total fluorescence, while the f/b NADH and LLS are pseudocolor images based on the phasor analysis of quantized fluorescent emission. f/b NADH was free to bound NADH ratio. LLS was long lifetime species

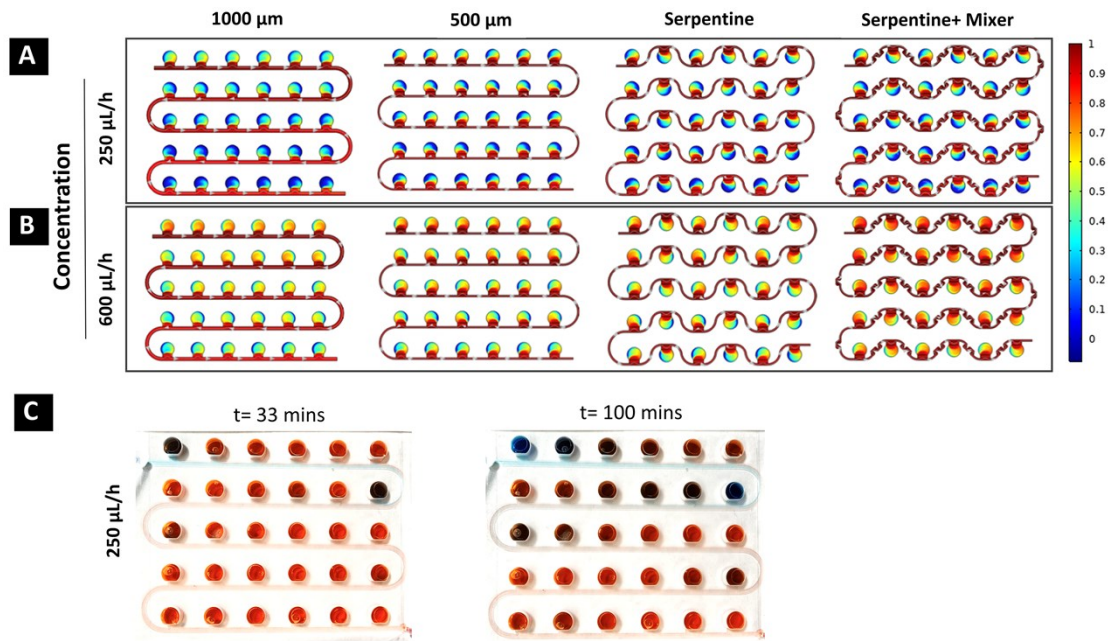

**Figure S2: COMSOL simulation and dye test of 5\*6 arrays bioreactor.** (A) Concentration distribution after 30 minutes of slow flow (250 µL/h); (B) Concentration distribution after 30 minutes of fast flow (600 µL/h); (C) Concentration pattern of the wide channel (1000 µm) design (5\*6 array) after 33 minutes and 100 minutes of 250 µL/h flow.

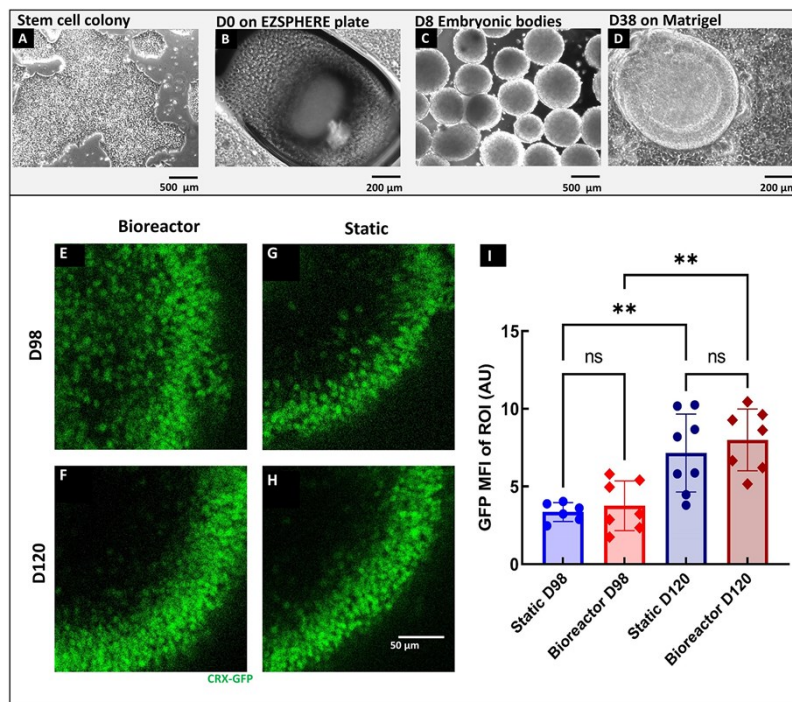

**Figure S3: Phase contrast and CRX-GFP fluorescence imaging results.** (A) Human embryonic stem cell colony; (B) Day 0 of differentiation, dissociated CRX-GFP stem cells in EZSPHERE microwell plate (well size: 800 µm); (C) Day 8 of differentiation, embryonic bodies ready for seeding on Matrigel; (D) Day 38 differentiation on Matrigel; (E-H) Fluorescence images showed distinct cell nuclear layer corresponding to the CRX-GFP fusion protein localized in nuclei; (I) The mean fluorescence intensity of GFP signals at D98 and D120 for static and bioreactor conditions.

region of interest (One-way ANOVA test was performed: Static D98, n = 6; Bioreactor D98, n = 7; Static D120 n = 8; Bioreactor D120, n = 7).

RtOgs in both static and bioreactor groups displayed a thick nuclear outer layer which expressed CRX gene on day 120 of differentiation (SFig. 3F, H). The mean fluorescent intensity (MFI) of the selected outer surface region showed no significant difference between static and bioreactor cultured RtOgs on day 98 and 120. However, both groups had a significant increase of MFI over time, which suggests an increase of CRX expression during RtOgs differentiation (SFig. 3I).

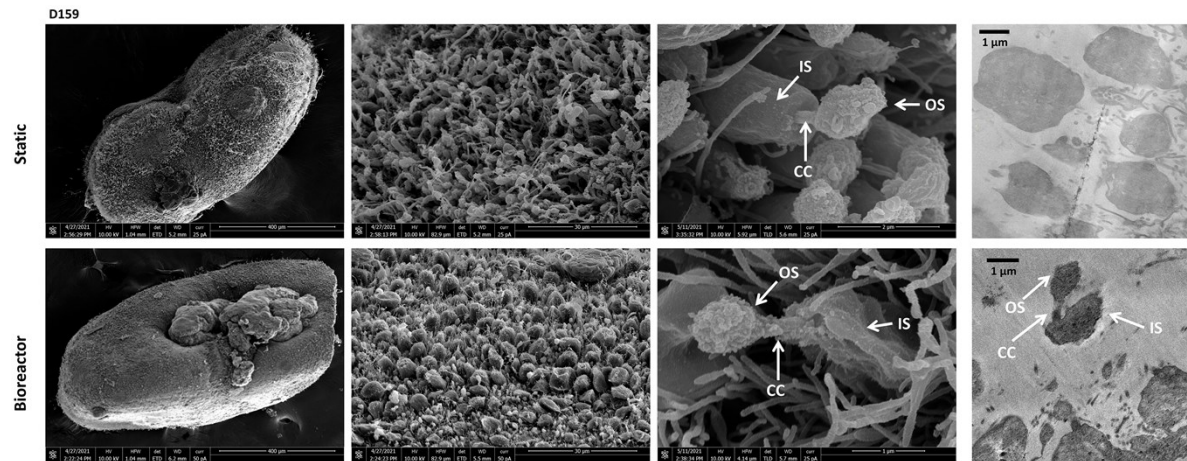

**Figure S4: SEM and TEM images of RtOgs on day 159 of differentiation showed outer segment-like structures.** Arrow markers: IS – inner segment, OS – outer segment, CC – connecting cilium.

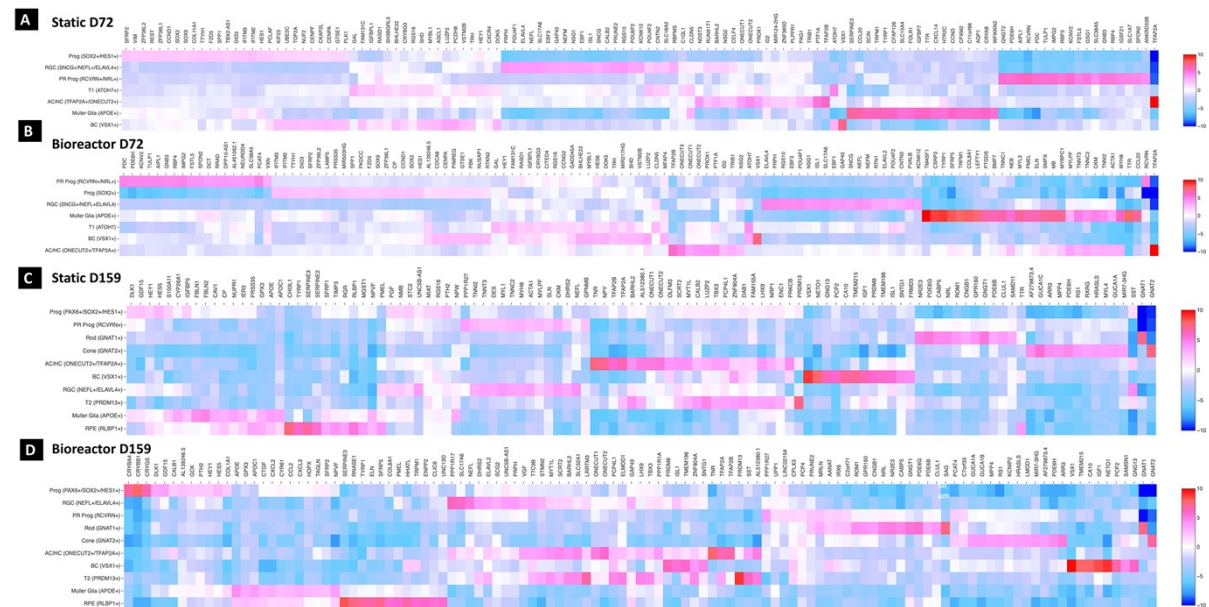

**Figure S5: Single-cell RNA gene expression heatmap of different samples. Clustered by cell types using Loupe Browser.**

**Table S1: Summary of Experimental Groups**

| Cell line      | Total time | Static & Bioreactor | PC                        | FLIM                       | IH          | GFP                       | scRNA       | qPCR        | SEM TEM     |
|----------------|------------|---------------------|---------------------------|----------------------------|-------------|---------------------------|-------------|-------------|-------------|
| <b>CRX-GFP</b> | D38-D72    | D41-D72 (31 days)   | <b>D41</b><br><b>D71</b>  | <b>D38</b><br><b>D71</b>   | <b>D72</b>  |                           | <b>D72</b>  |             |             |
|                | D87-D124   | D87-D124 (37 days)  | <b>D88</b><br><b>D124</b> | <b>D98</b><br><b>D120</b>  |             | <b>D98</b><br><b>D120</b> |             | <b>D124</b> |             |
|                | D125-D159  | D128-D159 (31 days) | <b>D158</b>               | <b>D125</b><br><b>D158</b> | <b>D159</b> |                           | <b>D159</b> |             | <b>D159</b> |
| <b>CSC-14</b>  | D70-D105   | D70-D105 (35 days)  |                           |                            |             |                           |             | <b>D105</b> |             |

\*PC – phase contrast imaging; FLIM – fluorescence lifetime imaging; IH – immunohistology; scRNA – single-cell RNA sequencing.

**Table S2: Information of qPCR primers**

| Gene name           | Official full name                       | GeneGlobe ID |
|---------------------|------------------------------------------|--------------|
| <b>CHX10 (VSX2)</b> | Visual system homeobox 2                 | QT00221081   |
| <b>NRL</b>          | Neural retina leucine zipper             | QT01005165   |
| <b>RAX</b>          | Retina and anterior neural fold homeobox | QT00212667   |
| <b>RCVRN</b>        | Recoverin                                | QT00014098   |
| <b>ARR3</b>         | Arrestin 3                               | QT00000182   |
| <b>SAG</b>          | S-antigen visual arrestin                | QT01007958   |
| <b>PRPH2</b>        | Peripherin 2                             | QT00094094   |
| <b>GNAT</b>         | G-protein subunit alpha transducin       | QT00235606   |
| <b>GNAT2</b>        | G-protein subunit alpha transducin 2     | QT00008764   |
| <b>RHO</b>          | Rhodopsin                                | QT01017058   |
| <b>OPN1SW</b>       | Opsin 1, short wave sensitive            | QT00017304   |
| <b>OPN1MW</b>       | Opsin 1, medium wave sensitive           | QT00040887   |
| <b>OPN1LW</b>       | Opsin 1, long wave sensitive             | QT01007356   |
| <b>RPL7</b>         | Ribosomal protein L7                     | QT01670137   |

**Table S3: Information of Antibodies**

| Antibody                  | Species | Concentration | Manufacturer                                           | Catalogue # | RRID                     |
|---------------------------|---------|---------------|--------------------------------------------------------|-------------|--------------------------|
| <b>Rhodopsin (Rho4D2)</b> | Mouse   | 1:100         | Gift of Dr. Molday [1], University of British Columbia | N/A         | AB_2315273<br>AB_2315274 |
| <b>Human NRL</b>          | Goat    | 1:100         | R&D Systems                                            | AF2945      | AB_2155098               |
| <b>Recoverin</b>          | Rabbit  | 1:2000        | Millipore                                              | AB5585      | AB_2253622               |
| <b>Calretinin</b>         | Goat    | 1:100         | Novus                                                  | AF5065      | AB_2068516               |
| <b>OTX2</b>               | Rabbit  | 1:1000        | ThermoFisher                                           | 701948      | AB_2608961               |
| <b>CHX10</b>              | Mouse   | 1:100         | Santa Cruz                                             | sc-365519   | AB_10842442              |
| <b>RG-opsin</b>           | Rabbit  | 1:1000        | Millipore                                              | AB5405      | AB_177456                |
| <b>Synaptophysin</b>      | Goat    | 1:100         | Novus                                                  | AF5555      | AB_2198864               |
| <b>PKC alpha</b>          | Rabbit  | 1:200         | Oxford Biomedical                                      | PK13        | N/A                      |
| <b>CRALBP</b>             | Rabbit  | 1:2000        | Fitzgerald                                             | 70R-19906   | N/A                      |

**Table S4: Key Reagents and Resources**

| Reagents or Resource                                            | Source                | Identifier      |
|-----------------------------------------------------------------|-----------------------|-----------------|
| <b>mTeSR 1 media</b>                                            | STEMCELL Technologies | Cat# 85850      |
| <b>ReLeSR</b>                                                   | STEMCELL Technologies | Cat# 100-0484   |
| <b>Vitronectin XF™</b>                                          | STEMCELL Technologies | Cat# 07180      |
| <b>Accutase</b>                                                 | Nacalai USA, Inc      | Cat# NU1267954  |
| <b>Growth factor reduced Matrigel</b>                           | Corning               | Cat# 354230     |
| <b>Dulbecco's modified eagle medium (DMEM)</b>                  | Gibco                 | Cat# 12100-038  |
| <b>F12 Nutrient Mixture</b>                                     | Gibco                 | Cat# 21700-026  |
| <b>N2 supplement</b>                                            | Gibco                 | Cat# 17-502-048 |
| <b>Minimum essential media non-essential amino acids (NEAA)</b> | Gibco                 | Cat# 11140-050  |
| <b>L-glutamine 200mM (100X)</b>                                 | Gibco                 | Cat# 25030-081  |
| <b>Heparin</b>                                                  | Sigma-Aldrich         | CAS 9041-08-1   |
| <b>B27 supplement (50X) (minus vitamin A)</b>                   | Gibco                 | Cat# 1587-010   |

|                                                                                                |                                                   |                                                                                                               |
|------------------------------------------------------------------------------------------------|---------------------------------------------------|---------------------------------------------------------------------------------------------------------------|
| <b>B27 Plus supplement (50X)</b>                                                               | Gibco                                             | Cat# A3582801                                                                                                 |
| <b>Taurine</b>                                                                                 | Sigma-Aldrich                                     | CAS# 107-35-7                                                                                                 |
| <b>Heat inactivated 10% fetal bovine serum (FBS)</b>                                           | Gibco                                             | Cat# 10438-026                                                                                                |
| <b>bFGF</b>                                                                                    | Peprotech                                         | Cat# 100-18B                                                                                                  |
| <b>Activin-A</b>                                                                               | Peprotech                                         | Cat# 120-14E                                                                                                  |
| <b>Collagenase IV</b>                                                                          | Gibco                                             | Cat# 17104019                                                                                                 |
| <b>Anti-cell adherence solution</b>                                                            | STEMCELL Technologies                             | Cat# 07010                                                                                                    |
| <b>Dulbecco's phosphate-buffered saline (DPBS) without calcium and magnesium (10X)</b>         | STEMCELL Technologies                             | Cat# 37354                                                                                                    |
| <b>TRizol reagent</b>                                                                          | Fisher                                            | Cat# 15596026                                                                                                 |
| <b>DNase I</b>                                                                                 | Invitrogen TURBO                                  | Cat# AM2238                                                                                                   |
| <b>Phenol/Chloroform/Isoamyl Alcohol</b>                                                       | Fisher                                            | Cat# BP1752I-400                                                                                              |
| <b>RT<sup>2</sup> cDNA synthesis kit</b>                                                       | Qiagen                                            | Cat# 330401                                                                                                   |
| <b>ROX qPCR master mix</b>                                                                     | Qiagen                                            | Cat# 330530                                                                                                   |
| <b>Worthington papain dissociation system</b>                                                  | Worthington                                       | <a href="http://www.worthington-biochem.com/PDS/cat.html">http://www.worthington-biochem.com/PDS/cat.html</a> |
| <b>10X Genomics Chromium Single Cell 3' Reagent Kit v3.1</b>                                   | 10X Genomics                                      | N/A                                                                                                           |
| <b>Kapa qPCR Library</b>                                                                       | Roche                                             | Cat# 07960140001                                                                                              |
| <b>Histo-VT One</b>                                                                            | Nacalai                                           | Product# 06380-05                                                                                             |
| <b>Vectashield Vibrance Antifade Mounting Medium</b>                                           | Vector Labs                                       | Cat# H-1700                                                                                                   |
| <b>Standard clear resin</b>                                                                    | Formlabs                                          | Cat# RS-F2-GPCL-04                                                                                            |
| <b>Optimum cutting temperature (OCT) compound (PolarStat Plus, StatLab, McKinney, TX, USA)</b> | Ted Pella Inc.                                    | Product# 27301-1                                                                                              |
| <b><u>Critical Commercial Assays</u></b>                                                       |                                                   |                                                                                                               |
| <b>0.6X SPRIselect</b>                                                                         | Beckman Coulter                                   | Cat# B23318                                                                                                   |
| <b>Qubit DNA HS assay</b>                                                                      | Life Technologies                                 | Cat Q32851                                                                                                    |
| <b>Agilent 2100 Bioanalyzer DNA HS</b>                                                         | Agilent                                           | Cat# 5067-1504                                                                                                |
| <b><u>Experimental Models: Cell Lines</u></b>                                                  |                                                   |                                                                                                               |
| <b>hESC, CRX-GFP H9</b>                                                                        | Dr. Majlinda Lako, Newcastle University [2-4], UK | Derived from NIH registration #004                                                                            |

|                      |                           |                        |
|----------------------|---------------------------|------------------------|
| <b>hESCs, CSC-14</b> | AIVITA<br>Biomedical Inc. | NIH registration #0284 |
|----------------------|---------------------------|------------------------|

**Equipment and Culture Plates**

|                                                                                     |                            |                         |
|-------------------------------------------------------------------------------------|----------------------------|-------------------------|
| <b>Formlabs Form 3B</b>                                                             | Formlabs                   | N/A                     |
| <b>Harrick</b>                                                                      | Harrick Plasma             | N/A                     |
| <b>#1.5, 64*50 mm, ClariTex</b>                                                     | Ted Pella Inc.             | Cat# 260378             |
| <b>Humidified 5% CO<sub>2</sub> incubator</b>                                       | Nuaire                     | N/A                     |
| <b>EZSPHERE 12-well plate (D: 800µm, d: 400µm]</b>                                  | Nacalai USA, Inc           | Cat# TCI-4815-903SP-10P |
| <b>Ultra-low attachment Corning Costar 24-well plate</b>                            | Corning                    | Cat# 07-200-602         |
| <b>CoolCLAVE Plus</b>                                                               | Genlantis                  | N/A                     |
| <b>50 mL Steriflip-GP sterile centrifuge tube with filter cap pore size 0.22 µm</b> | Millipore Sigma            | Cat# SCGP00525          |
| <b>MicroAmp™ optical adhesive film</b>                                              | Thermo Fisher Scientific   | Cat# 4311971            |
| <b>ESCO Class II Type A2 biosafety cabinet</b>                                      | ESCO Micro Pte. Ltd.       | N/A                     |
| <b>Zeiss LSM 780</b>                                                                | Carl Zeiss                 | N/A                     |
| <b>Mai Tai multi-photon laser source</b>                                            | Spectra-Physics<br>Mai Tai | N/A                     |
| <b>photomultiplier tube</b>                                                         | Hamamatsu<br>Photonics     | H7422p-40               |
| <b>FastFLIM FLIMbox</b>                                                             | ISS                        | N/A                     |
| <b>Nunc® Lab-Tek® II Chambered Coverglass</b>                                       | Thermo Fisher              | Cat# 155411             |
| <b>Olympus IX71</b>                                                                 | Olympus                    | N/A                     |
| <b>QICAM FAST1394 CCD camera</b>                                                    | Teledyne<br>QImaging       | N/A                     |
| <b>Bio-Rad C1000 Thermocycler</b>                                                   | Bio-Rad<br>Laboratories    | N/A                     |
| <b>Dynabeads MyOne SILANE</b>                                                       | Life Technologies          | N/A                     |
| <b>Illumina NovaSeq 6000</b>                                                        | Illumina                   | N/A                     |
| <b>Zeiss LSM700</b>                                                                 | Carl Zeiss                 | N/A                     |
| <b>JEOL 2100</b>                                                                    | JEOL USA, Inc.             | N/A                     |
| <b>FEI Magellan 400 XHR</b>                                                         | FEI Company                | N/A                     |

**Software and Algorithms**

|                                |                          |     |
|--------------------------------|--------------------------|-----|
| <b>COMSOL Multiphysics 5.6</b> | COMSOL, Inc.             | N/A |
| <b>SolidWorks 2020</b>         | SolidWorks<br>Corp.      | N/A |
| <b>Graphpad Prism</b>          | Graphpad<br>Software LLC | N/A |

---

|                            |                                       |                                                                                         |
|----------------------------|---------------------------------------|-----------------------------------------------------------------------------------------|
| <b>FASTQC</b>              | Babraham<br>Bioinformatics            | <a href="https://github.com/s-andrews/FastQC1">https://github.com/s-andrews/FastQC1</a> |
| <b>cellRanger v.3.1.0.</b> | 10X Genomics                          | N/A                                                                                     |
| <b>Zen 3.3 Software</b>    | Zeiss                                 | N/A                                                                                     |
| <b>Adobe Photoshop</b>     | Adobe                                 | N/A                                                                                     |
| <b>Etomo</b>               | University of<br>Colorado,<br>Boulder | N/A                                                                                     |

---



## References

1. Molday, R.S. and D. MacKenzie, *Monoclonal antibodies to rhodopsin: characterization, cross-reactivity, and application as structural probes*. *Biochemistry*, 1983. **22**(3): p. 653-60.
2. Collin, J., et al., *Using zinc finger nuclease technology to generate CRX-reporter human embryonic stem cells as a tool to identify and study the emergence of photoreceptors precursors during pluripotent stem cell differentiation*. *Stem Cells*, 2016. **34**(2): p. 311-321.
3. Collin, J., et al., *Deconstructing retinal organoids: single cell RNA-Seq reveals the cellular components of human pluripotent stem cell-derived retina*. *Stem Cells*, 2019. **37**(5): p. 593-598.
4. Collin, J., et al., *CRX expression in pluripotent stem cell-derived photoreceptors marks a transplantable subpopulation of early cones*. *Stem Cells*, 2019. **37**(5): p. 609-622.
